# Supplementary material for: Methylation of dual-specificity phosphatase 4 controls cell differentiation
Source: PubMed Central journal article supplement — Cell Rep. Author manuscript; Available in PMC 2022 May 16. (PMC9110119; doi:10.1016/j.celrep.2021.109421), 2021-07-27
Supplement: NIHMS1728537-supplement-1.pdf [file NIHMS1728537-supplement-1.pdf]

**Supplemental information**

**Methylation of dual-specificity phosphatase 4**

**controls cell differentiation**

**Hairui Su, Ming Jiang, Chamara Senevirathne, Srinivas Aluri, Tuo Zhang, Han Guo, Juliana Xavier-Ferrucio, Shuiling Jin, Ngoc-Tung Tran, Szu-Mam Liu, Chiao-Wang Sun, Yongxia Zhu, Qing Zhao, Yuling Chen, LouAnn Cable, Yudao Shen, Jing Liu, Cheng-Kui Qu, Xiaosi Han, Christopher A. Klug, Ravi Bhatia, Yabing Chen, Stephen D. Nimer, Y. George Zheng, Camelia Iancu-Rubin, Jian Jin, Haiteng Deng, Diane S. Krause, Jenny Xiang, Amit Verma, Minkui Luo, and Xinyang Zhao**

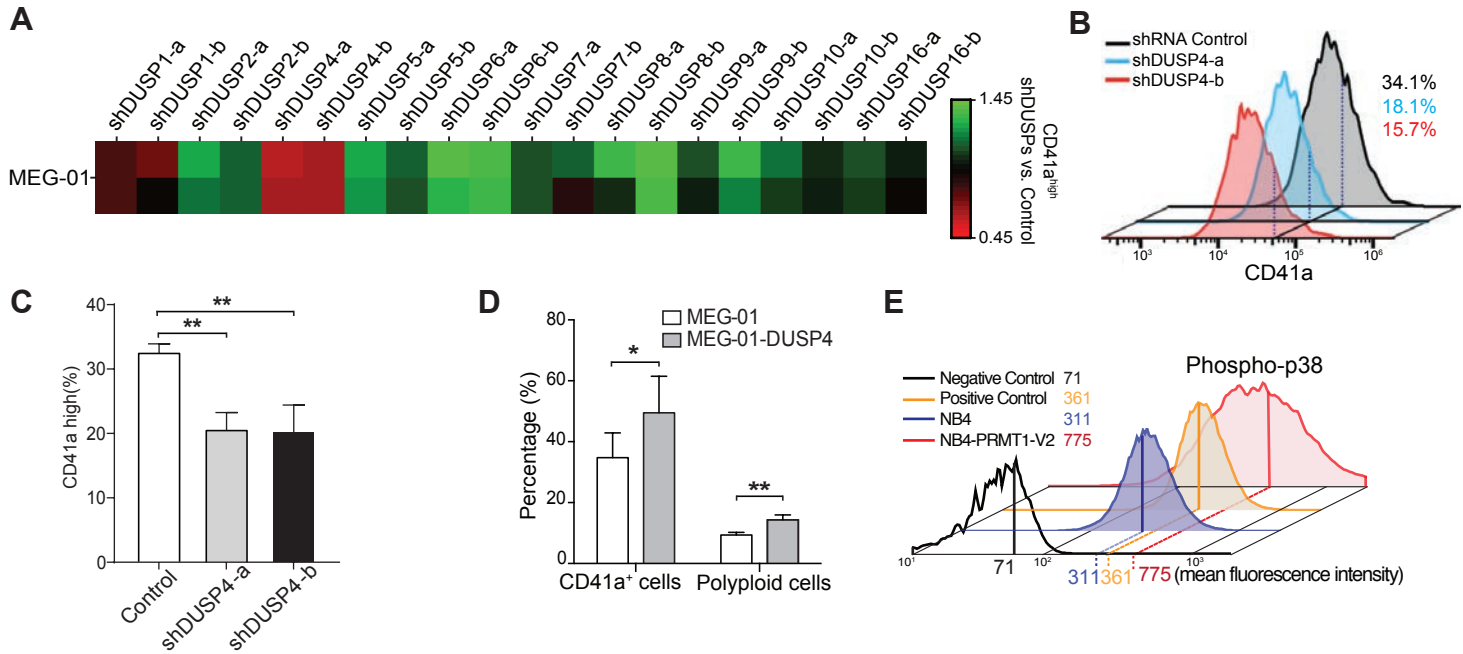

**Figure S1. Requirement of DUSP4 for optimal Mk differentiation of MEG-01 cells, related to Figure 1.**

(A) Heatmap of the percentages of CD41a<sup>+</sup> cells upon knockdown of DUSPs in MEG-01 cells. MEG-01 cells were infected with lentiviruses containing a control RNA or shRNAs against DUSPs. Two shRNAs were used for each DUSP with a replicate. Percentages of CD41a<sup>+</sup> cells in each DUSP knockdown were normalized to those of the paired control. Normalized ratios are indicated in the heatmap in color scale.

(B) and (C) Representative FACS and rigorous statistical analysis are respectively shown for the data above with 3 independent replicates (n = 3). Statistics were shown as mean ± SD, two-tailed paired t-test, \*\*P ≤ 0.01.

(D) Analysis of Mk differentiation of MEG-01 cells upon DUSP4 overexpression. MEG-01 cells and MEG-01-DUSP4 cells were collected for FACS analysis of CD41a and DNA content (PI staining). Cells with >4N of DNA content were characterized as polyloid. Statistics were shown as mean ± SD, two-tailed paired t-test, \*P ≤ 0.05; \*\*P ≤ 0.01 (n = 3, independent experiments).

(E) FACS analysis of the intracellular phospho-p38 level of parental and PRMT1-overexpressing NB4 cells. Cells were fixed by 0.4% PFA and then 4% PFA, and permeabilized by methanol for antibody staining. Negative and positive controls for NB4 cells without antibody stain and stained with anti-PE-phospho-S6K control antibody, respectively. Cells were harvested at indicated time points for western blotting. Representative plots are shown (n = 2, independent experiments).

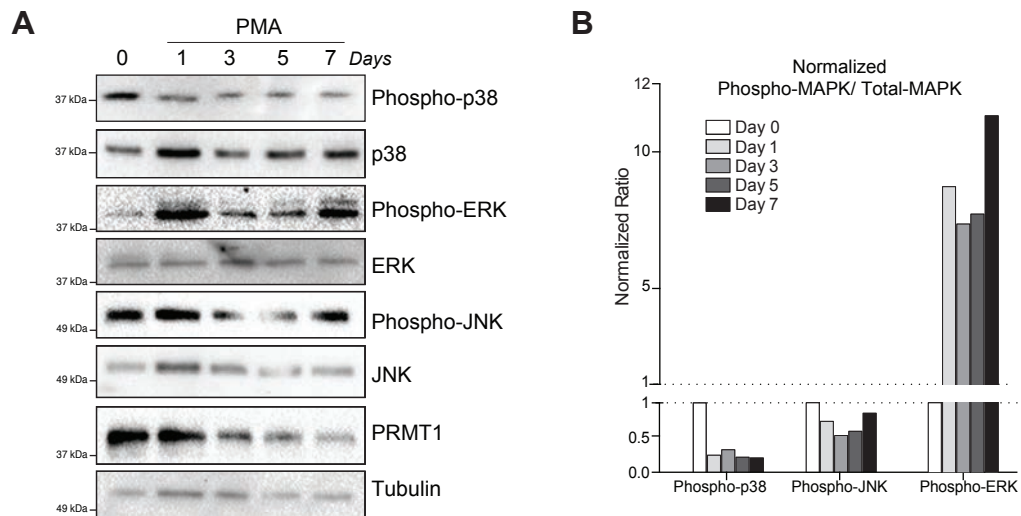

**Figure S2. JNK kinase phosphorylation was modestly changed during Mk differentiation of MEG01 cells, related to Figure 3.**  
 (A) MEG-01 cells were stimulated with PMA. The cell lysates were harvested on the indicated days for western blotting with antibodies shown the left side of blots.  
 (B) The ratio of band densities of activated kinases to total kinase levels.

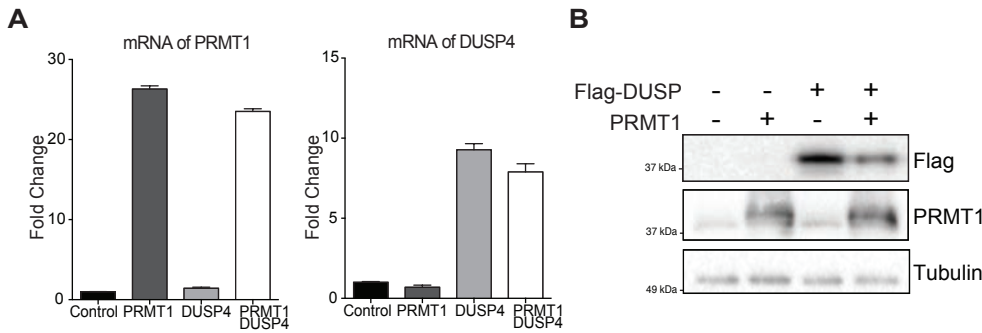

**Figure S3. Verification of overexpression of DUSP4 and PRMT1 in virus-transduced CD34+ cells, Related to Figure 3F.**

(A) Verification of gene expression after viral transduction. CD34+ cells were cultured in basic cytokine mix medium (IMDM, 20%BIT, SCF, FLT3L, TPO and IL-6) for two days before viral infection. Viral vectors pBGJR-DUSP4 and pTripZ-PRMT1V2 were used to express genes, and empty virus were used as controls. Three rounds of infection were performed with 12-hour gaps. Forty-eight hours post the last infection, puromycin was added to culture to select pTripZ infected cells. After 72 hours of selection, GFP+ cells (pBGJR-infected) were collected by flow cytometry. Expression of transduced genes were verified by qPCR. Representative statistics were shown as mean  $\pm$  SD, two-tailed paired t-test, \* $P \leq 0.05$ ; \*\* $P \leq 0.01$  ( $n = 2$ , independent experiments).

(B) Whole-cell extract of sorted cells were used for western blotting.

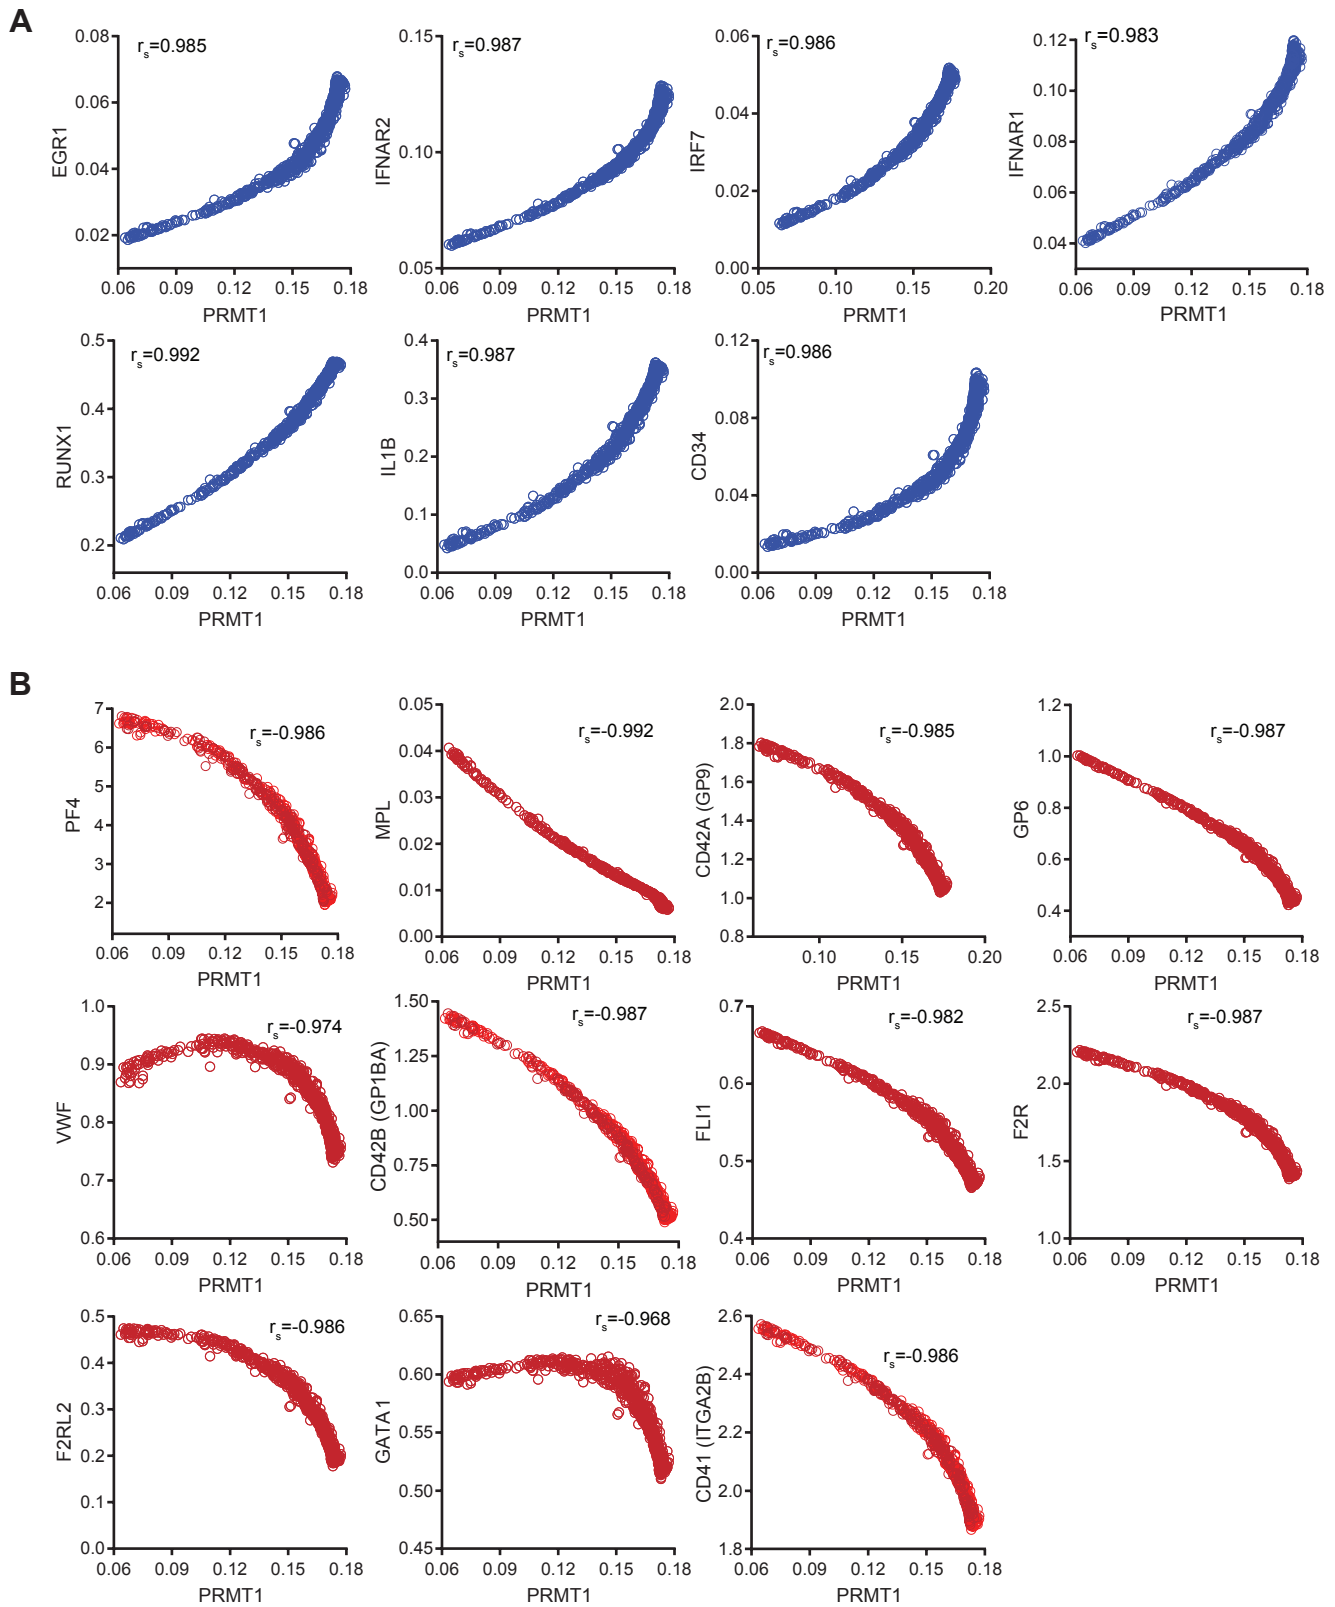

**Figure S4. Single-cell RNA sequencing analysis of the Spearman correlation between PRMT1 and the transcript signature associated with Mk differentiation, Related to Figure 4E and 4G.**

(A) and (B) Normalized transcripts of Mk-relevant genes negatively and positively correlated with PRMT1 in Mk-stimulated CD41a+CD42b+ cells with single-cell resolution.

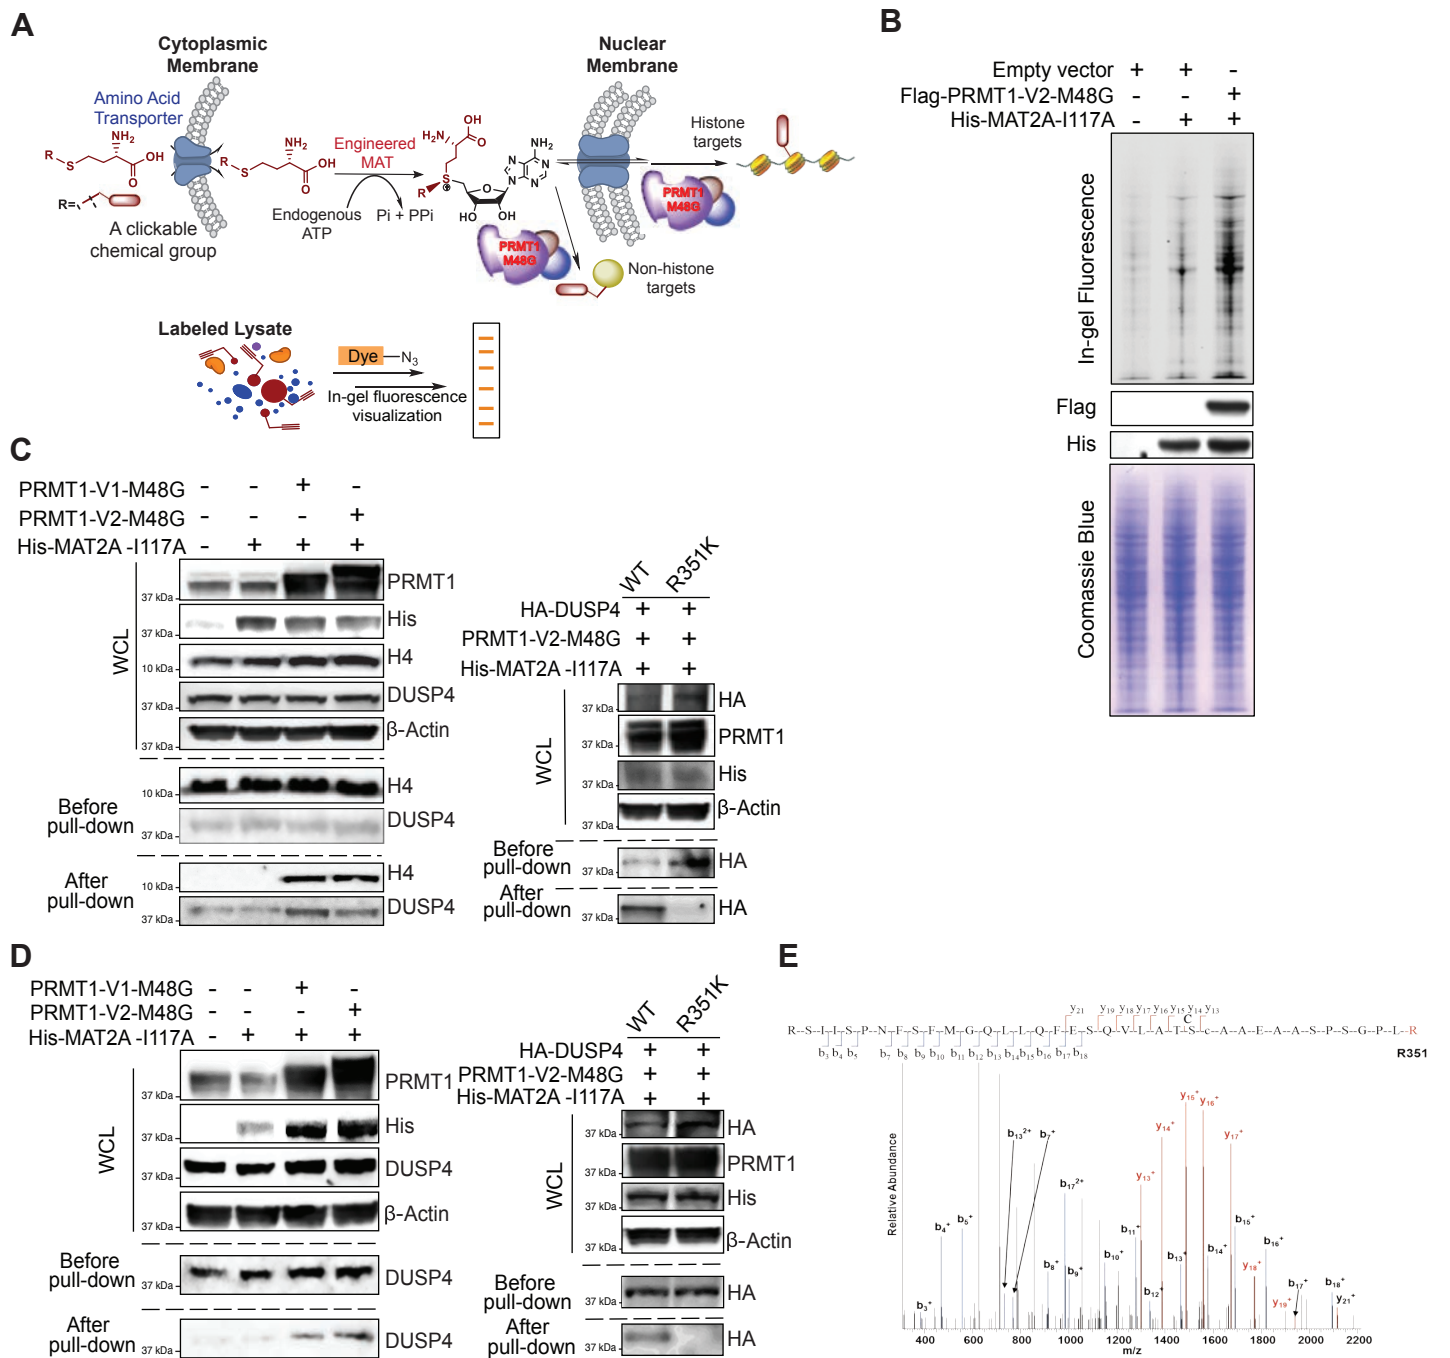

**Figure S5. Further validation of DUSP4 arginine methylation by BPPM and mass spectrometry, Related to Figure 5.**

(A) Schematic description of the BPPM technology coupled with in-gel fluorescence visualization. BPPM-labeled substrates were conjugated with TAMRA-dye via a click reaction, followed by electrophoresis and in-gel visualization.

(B) BPPM-revealed substrates of PRMT1 with in-gel fluorescence as readout. HEK293T cells were transfected with various combination of BPPM reagents. Their expression was confirmed by immunoblotting. The cell lysate was subject to TAMRA-dye via the click reaction, followed by in-gel fluorescence visualization. The total protein loading was shown by Coomassie Brilliant Blue staining.

(C) and (D) Revealing substrate(s) and methylation site(s) of PRMT1 with the next-generation live-cell BPPM technology. NB4 cells (C) and K562 cells (D) exposed with various combinations of BPPM reagents and DUSP4 (wild-type and R351K mutant) were treated with membrane permeable Hey-Met, which produces the SAM analogue cofactor Hey-SAM in situ, as described in Figure 5. Modified substrates were enriched by streptavidin beads and subject to western blotting. Samples before and after biotin-streptavidin pull-down were analyzed.

(E) Mass spectrometric analysis of methylated DUSP4 peptides. Recombinant DUSP4 was incubated with recombinant PRMT1 and SAM followed by SDS-PAGE separation. The DUSP4 band was digested with trypsin and subject to mass spectrum analysis. The fragment pattern was assigned as a DUSP4 peptide containing R351 methylation.

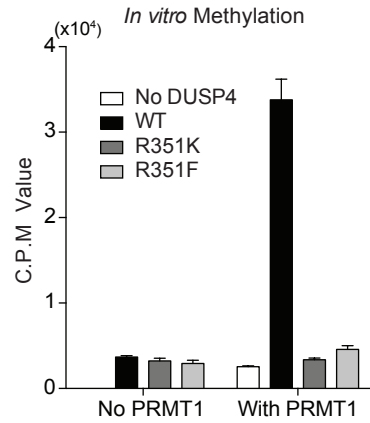

**Figure S6. In vitro methylation of DUSP4 by PRMT1, Related to Figure 5.** Recombinant PRMT1 was used to methylate recombinant wild-type and mutant DUSP4 protein. The PRMT1 protein and DUSP4 proteins were purified using Ni-bead via histidine tags. Scintillation counts of different reactions were performed by incubating recombinant PRMT1 and DUSP4 proteins with H3-SAM. Representative results were shown as mean  $\pm$  SD (n = 2, independent experiments).

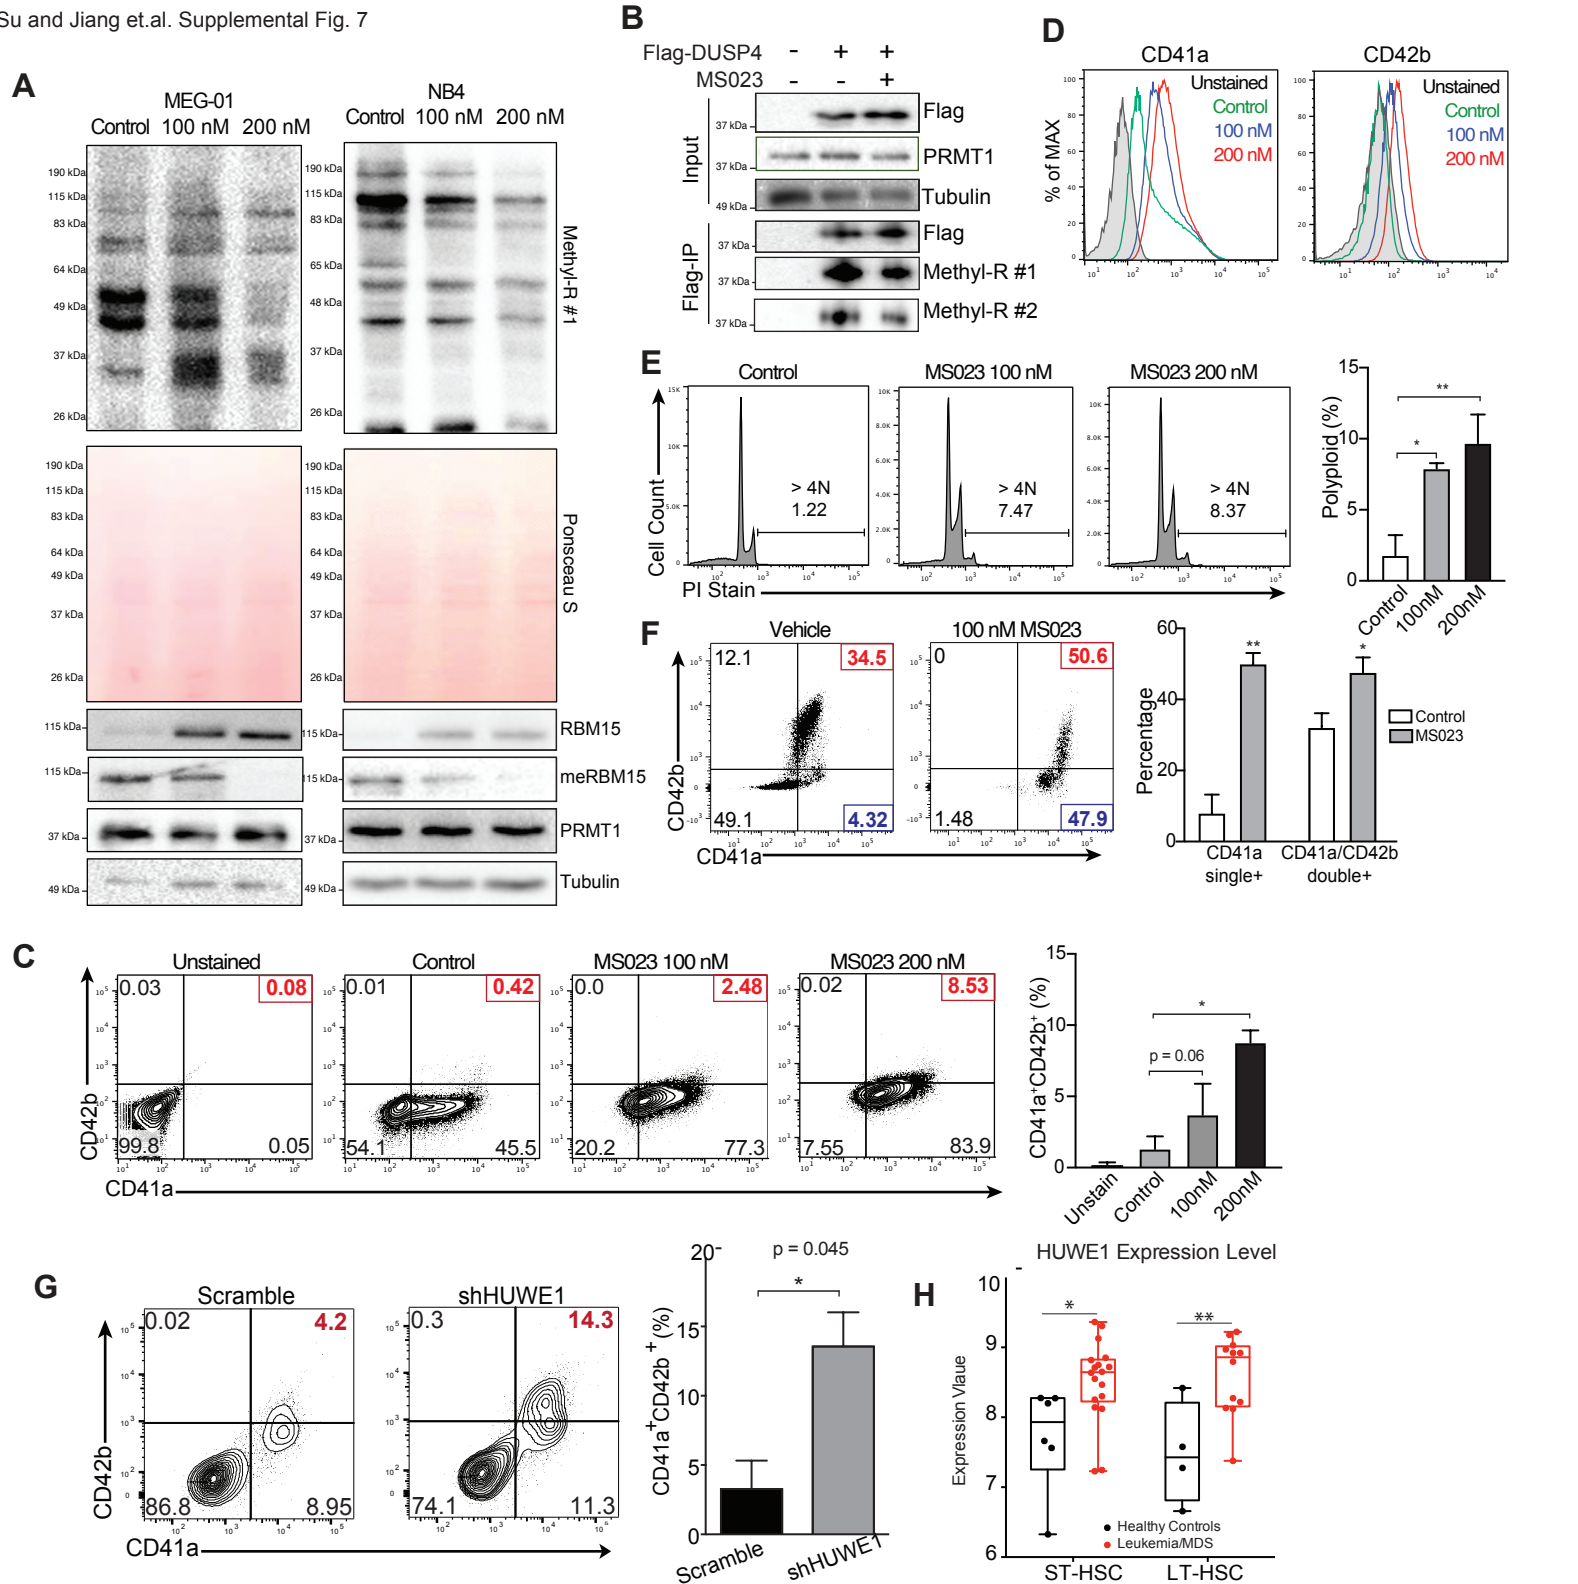



**Table S1. List of real-time PCR primers, related to Method details for real-time PCR analysis:**

| Name      | Sequence                      |
|-----------|-------------------------------|
| PRMT1-Fwd | 5' CCA GTG GAG AAG GTG GAC AT |
| PRMT1-Rev | 5' CTC CCA CCA GTG GAT CTT GT |
| DUSP4-Fwd | 5' AGG CGG CTA TGA GAG GTT TT |
| DUSP4-Rev | 5' CAC TGC CGA GGT AGA GGA AG |
| HPRT1-Fwd | 5' CAC CCT TTC CAA ATC CTC AG |
| HPRT1-Rev | 5' CTC CGT TAT GGC GAC CCG CA |

**Table S2. List of shRNAs against DUSPs, related to Figure 1,2 and Figure S1.**

|                     |                                           |
|---------------------|-------------------------------------------|
| <b>SGEP-based</b>   | Pelossof et al. 2017; Fellman et al 2013. |
| Control             | shRen.713                                 |
| <b>shRNA.name</b>   | <b>Antisense.Guide.Sequence</b>           |
| DUSP1-a             | TTATGTAACAAAATGTCTTCTT                    |
| DUSP1-b             | TTGTATAAAAAAGTCATCCTTA                    |
| DUSP2-a             | TCTGTATAAATATAAAGTGCTA                    |
| DUSP2-b             | TTCTGTATAAATATAAAGTGCT                    |
| DUSP4-a             | TACAACAACGACAACAAAGGGA                    |
| DUSP4-b             | TATTTCTAGAGGAAGCAGGGAG                    |
| DUSP5-a             | TTAAAAACA AAAATCACAGTTG                   |
| DUSP5-b             | TTTTCTTCACATTCACACGGGT                    |
| DUSP6-a             | TTAGTATTAACCAATTCCGCAC                    |
| DUSP6-b             | TAAAGAGAAAAAATCATGAGGA                    |
| DUSP7-a             | TTGAGTGACAGGTTTCATCTTCT                   |
| DUSP7-b             | TAAAAAGTAAACTCAGGTCCGT                    |
| DUSP8-a             | ATAATATACATTTATAACGGGC                    |
| DUSP8-b             | TATAATATACATTTATAACGGG                    |
| DUSP9-a             | AAGAAAGCAACTATGATATGGA                    |
| DUSP9-b             | TAAATAAACTGTTTATTTCAGAA                   |
| DUSP10-a            | TAAACAAAGGTTGAGATCCTGA                    |
| DUSP10-b            | TTAATTTGTCAGTTTGTGGGAG                    |
| DUSP16-a            | TATATTTTCAGATTTACAGGGAA                   |
| DUSP16-b            | ATATATTTTCAGATTTACAGGGAA                  |
|                     |                                           |
| <b>pLKO.1-based</b> |                                           |
| Control             | Scramble                                  |
| <b>Name</b>         | <b>Sequence</b>                           |
| DUSP4-#1            | GCCTACCTGATGATGAAGAAA                     |
| DUSP4-#2            | CCCAGTGGAAGATAACCACAA                     |
| HUWE1               | AAACCCAGGGCTGCCTTGAAAAG                   |

**Table S3. Mass spectrometry raw data analysis, related to Figure 5 and Star Methods:**

| #1 | b <sup>+</sup> | b <sup>2+</sup> | b <sup>3+</sup> | Seq.                  | y <sup>+</sup> | y <sup>2+</sup> | y <sup>3+</sup> | #2 |
|----|----------------|-----------------|-----------------|-----------------------|----------------|-----------------|-----------------|----|
| 1  | 157.10840      | 79.05784        | 53.04098        | R                     |                |                 |                 | 38 |
| 2  | 244.14043      | 122.57385       | 82.05166        | S                     | 3925.94648     | 1963.47688      | 1309.32034      | 37 |
| 3  | 357.22450      | 179.11589       | 119.74635       | I                     | 3838.91445     | 1919.96086      | 1280.30967      | 36 |
| 4  | 470.30857      | 235.65792       | 157.44104       | I                     | 3725.83038     | 1863.41883      | 1242.61498      | 35 |
| 5  | 557.34060      | 279.17394       | 186.45172       | S                     | 3612.74631     | 1806.87679      | 1204.92029      | 34 |
| 6  | 654.39337      | 327.70032       | 218.80264       | P                     | 3525.71428     | 1763.36078      | 1175.90961      | 33 |
| 7  | 768.43630      | 384.72179       | 256.81695       | N                     | 3428.66151     | 1714.83439      | 1143.55869      | 32 |
| 8  | 915.50472      | 458.25600       | 305.83976       | F                     | 3314.61858     | 1657.81293      | 1105.54438      | 31 |
| 9  | 1002.53675     | 501.77201       | 334.85043       | S                     | 3167.55016     | 1584.27872      | 1056.52157      | 30 |
| 10 | 1149.60517     | 575.30622       | 383.87324       | F                     | 3080.51813     | 1540.76270      | 1027.51089      | 29 |
| 11 | 1280.64567     | 640.82647       | 427.55341       | M                     | 2933.44971     | 1467.22849      | 978.48809       | 28 |
| 12 | 1337.66714     | 669.33721       | 446.56056       | G                     | 2802.40921     | 1401.70824      | 934.80792       | 27 |
| 13 | 1465.72572     | 733.36650       | 489.24676       | Q                     | 2745.38774     | 1373.19751      | 915.80076       | 26 |
| 14 | 1578.80979     | 789.90853       | 526.94145       | L                     | 2617.32916     | 1309.16822      | 873.11457       | 25 |
| 15 | 1691.89386     | 846.45057       | 564.63614       | L                     | 2504.24509     | 1252.62618      | 835.41988       | 24 |
| 16 | 1819.95244     | 910.47986       | 607.32233       | Q                     | 2391.16102     | 1196.08415      | 797.72519       | 23 |
| 17 | 1967.02086     | 984.01407       | 656.34514       | F                     | 2263.10244     | 1132.05486      | 755.03900       | 22 |
| 18 | 2096.06346     | 1048.53537      | 699.35934       | E                     | 2116.03402     | 1058.52065      | 706.01619       | 21 |
| 19 | 2183.09549     | 1092.05138      | 728.37001       | S                     | 1986.99142     | 993.99935       | 663.00199       | 20 |
| 20 | 2311.15407     | 1156.08067      | 771.05621       | Q                     | 1899.95939     | 950.48333       | 633.99131       | 19 |
| 21 | 2410.22249     | 1205.61488      | 804.07901       | V                     | 1771.90081     | 886.45404       | 591.30512       | 18 |
| 22 | 2523.30656     | 1262.15692      | 841.77370       | L                     | 1672.83239     | 836.91983       | 558.28231       | 17 |
| 23 | 2594.34368     | 1297.67548      | 865.45274       | A                     | 1559.74832     | 780.37780       | 520.58762       | 16 |
| 24 | 2695.39136     | 1348.19932      | 899.13530       | T                     | 1488.71120     | 744.85924       | 496.90858       | 15 |
| 25 | 2782.42339     | 1391.71533      | 928.14598       | S                     | 1387.66352     | 694.33540       | 463.22602       | 14 |
| 26 | 2942.45404     | 1471.73066      | 981.48953       | C-<br>Carbamidomethyl | 1300.63149     | 650.81938       | 434.21535       | 13 |
| 27 | 3013.49116     | 1507.24922      | 1005.16857      | A                     | 1140.60083     | 570.80405       | 380.87179       | 12 |
| 28 | 3084.52828     | 1542.76778      | 1028.84761      | A                     | 1069.56371     | 535.28549       | 357.19275       | 11 |
| 29 | 3213.57088     | 1607.28908      | 1071.86181      | E                     | 998.52659      | 499.76693       | 333.51371       | 10 |
| 30 | 3284.60800     | 1642.80764      | 1095.54085      | A                     | 869.48399      | 435.24563       | 290.49951       | 9  |
| 31 | 3355.64512     | 1678.32620      | 1119.21989      | A                     | 798.44687      | 399.72707       | 266.82047       | 8  |
| 32 | 3442.67715     | 1721.84221      | 1148.23057      | S                     | 727.40975      | 364.20851       | 243.14143       | 7  |
| 33 | 3539.72992     | 1770.36860      | 1180.58149      | P                     | 640.37772      | 320.69250       | 214.13076       | 6  |
| 34 | 3626.76195     | 1813.88461      | 1209.59217      | S                     | 543.32495      | 272.16611       | 181.77983       | 5  |
| 35 | 3683.78342     | 1842.39535      | 1228.59932      | G                     | 456.29292      | 228.65010       | 152.76916       | 4  |
| 36 | 3780.83619     | 1890.92173      | 1260.95025      | P                     | 399.27145      | 200.13936       | 133.76200       | 3  |

|    |            |            |            |          |           |           |           |   |
|----|------------|------------|------------|----------|-----------|-----------|-----------|---|
| 37 | 3893.92026 | 1947.46377 | 1298.64494 | L        | 302.21868 | 151.61298 | 101.41108 | 2 |
| 38 |            |            |            | R-Methyl | 189.13461 | 95.07094  | 63.71639  | 1 |
